# Supplementary material for: The Association between Coffee Consumption and Risk of Colorectal Cancer in a Korean Population
Source: MDPI journal article supplement (doi:10.3390/nu13082753), 2021-08-11
Supplement: s1 [file s1]

**Supplementary Table S1.** Characteristics of cases and control

|                                                           | Total       |              |                               | Male        |             |                               | Female      |             |                               |
|-----------------------------------------------------------|-------------|--------------|-------------------------------|-------------|-------------|-------------------------------|-------------|-------------|-------------------------------|
|                                                           | case        | control      | <i>P</i> -value <sup>b)</sup> | case        | control     | <i>P</i> -value <sup>b)</sup> | case        | control     | <i>P</i> -value <sup>b)</sup> |
| <b>n</b>                                                  | 923         | 1846         |                               | 625         | 1250        |                               | 298         | 596         |                               |
| <b>Age<sup>a)</sup>, years</b>                            | 56.58±9.71  | 56.09±9.12   | 0.1996                        | 57.2±9.4    | 56.63±8.73  | 0.2046                        | 55.28±10.23 | 54.95±9.79  | 0.6426                        |
| <b>BMI<sup>a)</sup>, kg/m<sup>2</sup></b>                 | 24.00±3.44  | 24.26±2.86   | 0.0502                        | 23.93±0.13  | 24.61±0.08  | <.0001                        | 24.16±3.99  | 23.53±2.97  | 0.0164                        |
| <b>Physical activity, MET h/week</b>                      |             |              |                               |             |             |                               |             |             |                               |
| <5                                                        | 78 (8.5)    | 276 (15.0)   | <.0001                        | 50 (8.0)    | 168 (13.4)  | <.0001                        | 28 (9.40)   | 108 (18.12) | 0.002                         |
| 5-<20                                                     | 251 (27.2)  | 423 (22.9)   |                               | 163 (26.1)  | 240 (19.2)  |                               | 88 (29.53)  | 183 (30.70) |                               |
| 20-<50                                                    | 341 (36.9)  | 542 (29.4)   |                               | 227 (36.3)  | 366 (29.3)  |                               | 114 (38.26) | 176 (29.53) |                               |
| ≥50                                                       | 253 (27.4)  | 605 (32.8)   |                               | 185 (29.6)  | 476 (38.1)  |                               | 68 (22.82)  | 129 (21.64) |                               |
| <b>Education level</b>                                    |             |              |                               |             |             |                               |             |             |                               |
| Middle school or lower                                    | 321 (34.8)  | 282 (15.6)   | <.0001                        | 183 (29.3)  | 175 (14.4)  | <.0001                        | 138 (46.31) | 107 (18.23) | <.0001                        |
| High school                                               | 369 (40.0)  | 587 (32.6)   |                               | 266 (42.6)  | 329 (27.1)  |                               | 103 (34.56) | 258 (43.95) |                               |
| College or higher                                         | 233 (25.2)  | 934 (51.8)   |                               | 176 (28.2)  | 712 (58.6)  |                               | 57 (19.13)  | 222 (37.82) |                               |
| <b>Smoking status</b>                                     |             |              |                               |             |             |                               |             |             |                               |
| Non-smoker                                                | 409 (44.31) | 818 (44.31)  | 0.156                         | 145 (23.2)  | 247 (19.8)  | 0.082                         | 264 (88.59) | 571 (95.81) | <.0001                        |
| Ex-smoker                                                 | 318 (34.45) | 687 (37.22)  |                               | 303 (48.5)  | 671 (53.7)  |                               | 15 (5.03)   | 16 (2.68)   |                               |
| Current smoker                                            | 196 (21.24) | 341 (18.47)  |                               | 177 (28.3)  | 332 (26.6)  |                               | 19 (6.38)   | 9 (1.51)    |                               |
| <b>Alcohol consumption</b>                                |             |              |                               |             |             |                               |             |             |                               |
| Non-drinker                                               | 279 (30.23) | 560 (30.34)  | 0.0004                        | 107 (17.12) | 200 (16.00) | 0.0013                        | 172 (57.72) | 360 (60.40) | 0.1906                        |
| Ex-drinker                                                | 129 (13.98) | 169 (9.15)   |                               | 103 (16.48) | 136 (10.88) |                               | 26 (8.72)   | 33 (5.54)   |                               |
| Current drinker                                           | 515 (55.8)  | 1117 (60.51) |                               | 415 (66.40) | 914 (73.12) |                               | 100 (33.56) | 203 (34.06) |                               |
| <b>Occupation</b>                                         |             |              |                               |             |             |                               |             |             |                               |
| Professionals, administrative, management, or office jobs | 189 (20.48) | 481 (26.39)  | <.0001                        | 160 (25.60) | 389 (31.57) | <.0001                        | 29 (9.73)   | 92 (15.57)  | <.0001                        |
| Sales or service industry workers                         | 38 (4.12)   | 403 (22.11)  |                               | 28 (4.48)   | 308 (25.00) |                               | 10 (3.36)   | 95 (16.07)  |                               |
| Agriculturist, soldier or manufacturing workers           | 141 (15.28) | 241 (13.22)  |                               | 121 (19.36) | 221 (17.94) |                               | 20 (6.71)   | 20 (3.38)   |                               |
| Housekeeper, the jobless or others                        | 555 (60.13) | 698 (38.29)  |                               | 316 (50.56) | 314 (25.49) |                               | 239 (80.20) | 384 (64.97) |                               |

|                                                         |             |              |        |              |              |        |              |              |        |
|---------------------------------------------------------|-------------|--------------|--------|--------------|--------------|--------|--------------|--------------|--------|
| <b>First-degree family history of colorectal cancer</b> |             |              |        |              |              |        |              |              |        |
| Yes                                                     | 86 (9.32)   | 99 (5.37)    | <.0001 | 65 (10.40)   | 58 (4.65)    | <.0001 | 21 (7.05)    | 41 (6.88)    | 0.9258 |
| No                                                      | 837 (90.68) | 1743 (94.63) |        | 560 (89.60)  | 1188 (95.35) |        | 277 (92.95)  | 555 (93.12)  |        |
| <b>Energy intake<sup>a</sup>, kcal/d</b>                | 2026.3±534  | 1689.6±560.4 | <.0001 | 2127.4±509.1 | 1730.4±547.2 | <.0001 | 1814.4±523.5 | 1604.0±578.4 | <.0001 |
| <b>Coffee additives</b>                                 |             |              |        |              |              |        |              |              |        |
| Coffee sugar <sup>a</sup> , g/day                       | 5.93±6.35   | 3.49±4.55    | <.0001 | 6.78±6.82    | 3.93±4.82    | <.0001 | 4.14±4.76    | 2.55±3.74    | <.0001 |
| Coffee cream <sup>a</sup> , g/day                       | 4.22±4.94   | 2.23±3.40    | <.0001 | 4.93±5.34    | 2.52±3.57    | <.0001 | 2.73±3.54    | 1.62±2.95    | <.0001 |

MET, metabolic equivalent of task

<sup>a</sup> Values are means ± SD

<sup>b</sup> *P*-values were derived from the chi square test for categorical variables and linear regression for a continuous variable
